# Supplementary material for: Medication-Related Fall Incidents in an Older, Ambulant Population: The B-PROOF Study
Source: Springer Nature journal article supplement (doi:10.1007/s40266-014-0225-x), 2014-11-14
Supplement: MOESM1 [file 9341782]

**Electronic Supplementary Material**

Electronic Supplementary Material Table S1. Significant associations between the use of fall-risk increasing drugs and fall risk, additionally adjusted for ‘history of falls’.

|  | Number of users (%) a | Model 1 b  (HR [95%CI]) | Model 2 c  (HR [95%CI]) | Model 3 d  (HR [95%CI]) p-value | | Model 4 e |
| --- | --- | --- | --- | --- | --- | --- |
| Antiarrhythmic | 36 (1.5) | 1.59 (1.11-2.83) | 1.59 (1.10-2.29) | 1.61 (0.12-2.32) | p=0.010* | 1.63 (1.13-2.34)* |
| non-selective β-blockers | 130 (5.4) | 1.37 (1.09-1.72) | 1.36 (1.08-1.71) | 1.41 (1.12-1.78) | p=0.003* | 1.41 (1.12-178)* |
| Statins | 527 (21.9) | 0.80 (0.70-0.92) | 0.83 (0.72-0.95) | 0.81 (0.71-0.94) | p=0.004* | 0.82 (0.71-0.94)* |
| Benzodiazepines | 100 (4.2) | 1.46 (1.14-1.89) | 1.30 (1.01-1.69) | 1.32 (1.02-1.71) | p=0.033* | 1.31 (1.02-1.70)* |
| Antidepressants | 95 (4.0) | 1.39 (1.07-1.80) | 1.30 (1.00-1.69) | 1.31 (1.00-1.70) | p=0.046* | 1.40 (1.07-1.80) f* |

a The number of users (%) at baseline.

b Model 1: crude model.

c Model 2: adjusted for age, sex, intervention status, MMSE, GDS, and study centre.

d Model 3: confounders model 2, plus the other significantly associated drugs from model 2.

e Model 4: confounders model 3, plus ‘history of falls’.

f Model 4: confounders model 3, plus ‘history of falls’ and physical performance.

*P-value <0.05.

HR= hazard ratio, CI=confidence interval, MMSE=Mini-Mental State Examination, GDS= Geriatric Depression ScaleElectronic Supplementary Material Table S2. Dose-response relationships for medication groups that were significantly associated with fall risk.

|  | Number of users a | Model 1 b  (HR [95%CI]) | Model 2 c  (HR [95%CI]) | Model 3 d  (HR [95%CI]) p-value | |
| --- | --- | --- | --- | --- | --- |
| Antiarrhythmic  ≤ median (0.75 DDD)  > median (0.75 DDD) | 15  15 | 1.60 (0.96-2.66)  1.58 (0.95-2.63) | 1.49 (0.89-2.48)  1.70 (1.02-2.84) | 1.47 (0.88-2.46)  1.78 (1.07-2.97) | 0.137  0.027* |
| Non-selective β-blocker  ≤ median (0.50 DDD)  > median (0.50 DDD) | 20  20 | 1.34 (0.86-2.08)  1.35 (0.86-2.13) | 1.38 (0.89-2.15)  1.35 (0.85-2.12) | 1.45 (0.93-2.26)  1.40 (0.89-2.22) | 0.103  0.144 |
| Statins  < median (1.00 DDD)  ≥ median (1.00 DDD) | 110  143 | 0.80 (0.66-0.97)  0.80 (0.67-0.96) | 0.82 (0.67-0.99)  0.83 (0.70-0.99) | 0.80 (0.66-0.98)  0.82 (0.69-0.99) | 0.029  0.033 |
| Benzodiazepines  ≤ median (0.50 DDD)  > median (0.50 DDD) | 38  24 | 1.48 (0.11-2.04)  1.40 (0.93-2.09) | 1.30 (0.94-1.80)  1.27 (0.85-1.91) | 1.30 (0.94-1.81)  1.32 (0.88-1.98) | 0.116  0.186 |
| Antidepressants  < median (1.00 DDD)  ≥ median (1.00 DDD) | 33  29 | 1.61 (1.13-2.29)  1.21 (0.84-1.75) | 1.52 (1.06-2.16)  1.12 (0.77-1.63) | 1.59 (1.11-2.26)  1.23 (0.85-1.79) | 0.011 e*  0.272 e |

a The number of cases using the medication group.

b Model 1: crude model.

c Model 2: adjusted for age, sex, intervention status, MMSE, GDS, and study centre.

d Model 3: confounders model 2, plus the other significantly associated drugs from model 2.

e Model 3: confounders model 2, plus physical performance.

*P-value <0.05.

HR= hazard ratio, CI=confidence interval, DDD=defined daily dose, MMSE=Mini-Mental State Examination, GDS= Geriatric Depression Scale
